# Supplementary material for: New bent-core mesogens with carbon–carbon multiple linkages in the terminal chains
Source: Royal Society of Chemistry journal article supplement (doi:10.1039/b803493a), 2008-01-01
Supplement: b803493a.pdf [file b803493a.pdf]

## Electronic Supplementary Information

### New bent-core mesogens with carbon-carbon multiple linkages in the terminal chains

Gerhard Pelzl, Maria G. Tamba, Sonja Findeisen-Tandel, Martin. W. Schröder, Ute Baumeister, Siegmund Diele, Wolfgang Weissflog\*

#### Content:

1. Analytical data of compounds **A16/in-11** and **B14/in-3**
2. Table S1: References of bent-core mesogens containing different unsaturated chains R at one or both terminal positions
3. Table S2: Effect of the insertion of C=C bonds into both terminal chains on the mesophase behaviour of bent-core mesogens with increasing aromatic core
4. Additional microscopic pictures of the growing process of spiral filaments of different shape, myelinic-like domains, banana leaf-like domains, ribbon-like domains or circular domains on cooling the isotropic liquid of compound **A14/in-3**

#### Analytical data:

Analytical data are given for the compounds **A16/in-11** and **B14/in-3** as representatives for members of series **A** and **B**:

*Bis[4-(4-n-hexadec-11-ynyloxycarbonylbenzylideneamino)phenyl] isophthalate (A16/in-11)*  
Melting behaviour: see Table 1

Elemental analysis: C<sub>68</sub>H<sub>80</sub>O<sub>8</sub>N<sub>2</sub> (Mm = 1053.34); C 77.53, H 7.66, N 2.66 (calc.); C 77.18, H 7.83, N 2.31 (found);

<sup>1</sup>H-NMR (400 MHz, CDCl<sub>3</sub>): δ 0.88 (m, 6H, CH<sub>3</sub>), 1.29-1.52 (m, 36H, CH<sub>2</sub>), 1.78 (m, 4H, ArCOOCH<sub>2</sub>CH<sub>2</sub>), 2.12 (m, 8H, CH<sub>2</sub>C≡CCH<sub>2</sub>), 4.33 (t, <sup>3</sup>J = 6.7 Hz, 4H, ArCOOCH<sub>2</sub>CH<sub>2</sub>), 7.30 (m, 8H, Ar-H), 7.69 (t, <sup>3</sup>J = 7.9 Hz, 1H, Ar-H), 7.97 (d, <sup>3</sup>J = 8.5 Hz, 4H, Ar-H), 8.13 (d, <sup>3</sup>J = 8.5 Hz, 4H, Ar-H), 8.47 (m, 2H, Ar-H), 8.53 (s, 2H, CH=N), 9.03 (s, 1H, Ar-H).

*Bis{4-[2-(4-n-tetradec-3-ynyloxycarbonyl)ethenylbenzylideneamino]phenyl} isophthalate (B14/in-3)*  
Melting behaviour: see Table 2

Elemental analysis: C<sub>68</sub>H<sub>76</sub>O<sub>8</sub>N<sub>2</sub> (Mm = 1049.31): C 77.83, H 7.30, N 2.67 (calc.); C 77.54, H 7.45, N 2.40 (found);

<sup>1</sup>H-NMR (400 MHz, CDCl<sub>3</sub>): δ 0.86 (t, <sup>3</sup>J = 6.9 Hz, 6H, CH<sub>3</sub>), 1.23-1.51 (m, 32H, CH<sub>2</sub>), 2.14 (m, 4H, ArCH=CHCOOCH<sub>2</sub>CH<sub>2</sub>C≡CCH<sub>2</sub>CH<sub>2</sub>), 2.56 (m, 4H, ArCH=CHCOOCH<sub>2</sub>CH<sub>2</sub>C≡CCH<sub>2</sub>), 4.28 (t, <sup>3</sup>J = 6.9 Hz, 4H, ArCOOCH<sub>2</sub>CH<sub>2</sub>C≡CCH<sub>2</sub>), 6.52 (d, <sup>3</sup>J = 16.0 Hz, 2H, ArCH=CHCOOCH<sub>2</sub>), 7.29 (m, 8H, ArH), 7.62 (d, <sup>3</sup>J = 8.5 Hz, 4H, Ar-H), 7.69 (t, <sup>3</sup>J = 7.5 Hz, 1H, Ar-H), 7.72 (d, <sup>3</sup>J = 16.0 Hz, 2H, ArCH=CHCOOCH<sub>2</sub>), 7.92 (d, <sup>3</sup>J = 8.3 Hz, 4H, Ar-H), 8.47 (m, 2H, Ar-H), 8.48 (s, 2H, CH=N), 9.02 (s, 1H, Ar-H).

**Table S1:** References of bent-core mesogens containing different unsaturated chains R at one or both terminal positions (R is related to the general formula shown in Scheme 1)

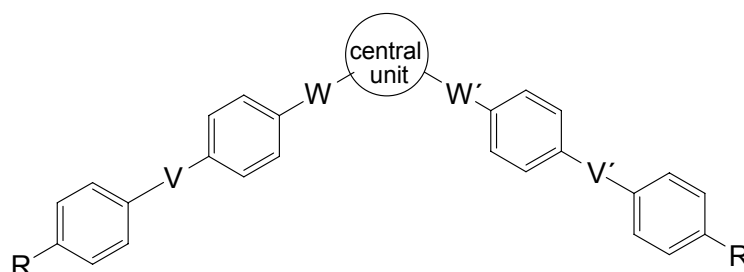

| <b>-R</b>                                                                     | <b>n</b>  | <b>R at one terminal position</b> | <b>R at both terminal positions</b> |
|-------------------------------------------------------------------------------|-----------|-----------------------------------|-------------------------------------|
| $-\text{O}-(\text{CH}_2)_n-\text{CH}=\text{CH}_2$                             | 9, 8      | [S1-S7]                           | [S6, S10-S14]                       |
| $-\text{COO}-(\text{CH}_2)_n-\text{CH}=\text{CH}_2$                           | 8         |                                   | [S12]                               |
| $-\text{O}-(\text{CH}_2)_{10}\text{CH}=\text{CHCH}_3$ ( <i>cis</i> )          |           |                                   | [S15]                               |
| $-\text{O}-(\text{CH}_2)_8\text{CH}=\text{CHC}_8\text{H}_{17}$ ( <i>cis</i> ) |           |                                   | [S15]                               |
| $-\text{O}-(\text{CH}_2)_n\text{OOCCH}=\text{CH}_2$                           | 11,12     | [S8]                              | [S15-S17]                           |
| $-\text{O}-(\text{CH}_2)_n\text{OOC}(\text{CH}_3)=\text{CH}_2$                | 6,11,12   | [S8]                              | [S15-S16]                           |
| $-\text{O}-(\text{CH}_2)_n\text{CH}=\text{CH}-\text{CH}=\text{CH}_2$          | 8, 10, 14 |                                   | [S18]                               |
| $-\text{O}-(\text{CH}_2)_6\text{OCH}_2\text{CH}=\text{CH}_2$                  |           | [S9]                              |                                     |

**Table S 2:** Effect of the insertion of C=C bonds into both terminal chains on the mesophase behaviour of bent-core mesogens with increasing aromatic core.  $\Delta T$  means the depression of the clearing temperatures caused by replacement the undecyloxy with undecenyl chains.

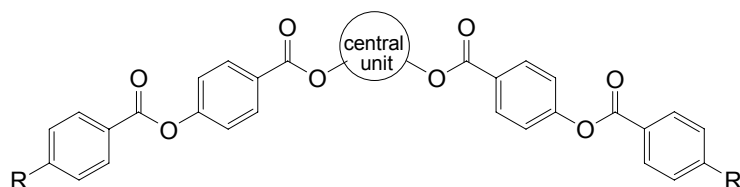

| Central unit                                                                        | R-                                                    | Mesophase behaviour                  | $\Delta T$        |
|-------------------------------------------------------------------------------------|-------------------------------------------------------|--------------------------------------|-------------------|
| 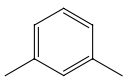   | C <sub>11</sub> H <sub>23</sub> O-                    | Cr 105 SmCP <sub>A</sub> 113 I [S10] | $\Delta T = -18K$ |
|                                                                                     | CH <sub>2</sub> =CH-C <sub>9</sub> H <sub>18</sub> O- | Cr 101 SmCP <sub>A</sub> 95 I [S11]  |                   |
|   | C <sub>11</sub> H <sub>23</sub> O-                    | Cr 85 N 113 I [S19]                  | $\Delta T = -20K$ |
|                                                                                     | CH <sub>2</sub> =CH-C <sub>9</sub> H <sub>18</sub> O- | Cr 79 N 83 I [S11]                   |                   |
|  | C <sub>11</sub> H <sub>23</sub> O-                    | Cr 136 SmCP <sub>A</sub> 169 I [S20] | $\Delta T = -11K$ |
|                                                                                     | CH <sub>2</sub> =CH-C <sub>9</sub> H <sub>18</sub> O- | Cr 126 SmCP <sub>A</sub> 158 I [S12] |                   |
|  | C <sub>11</sub> H <sub>23</sub> O-                    | Cr 87 Col <sub>r</sub> 157 I [S21]   | $\Delta T = -11K$ |
|                                                                                     | CH <sub>2</sub> =CH-C <sub>9</sub> H <sub>18</sub> O- | Cr 99 Col <sub>r</sub> 146 I [S10]   |                   |

**Figs. S1 – S6: POM images** of compound **A14/in-3** for further studies of the growing process of spiral filaments of different shape, myelinic-like and banana leaf-like domains, ribbon-like or circular domains, which can simultaneously occur in the same sample (thickness 6  $\mu\text{m}$  and 10  $\mu\text{m}$ ) on slow cooling the isotropic liquid.

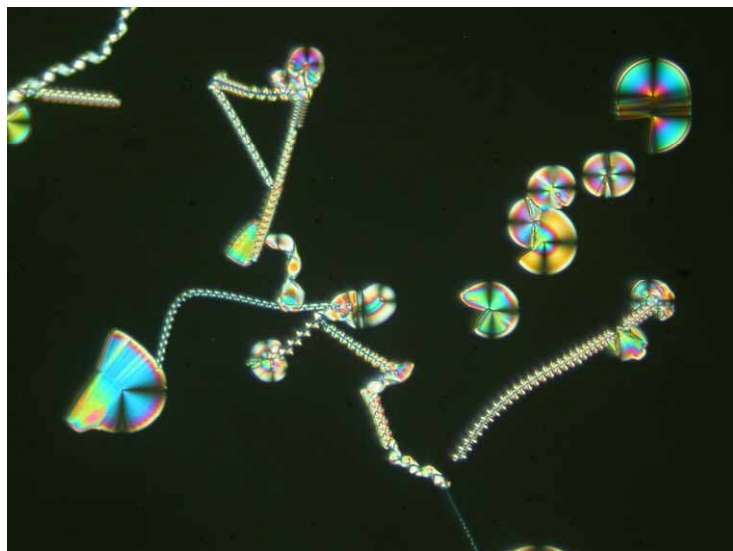

Fig. S1

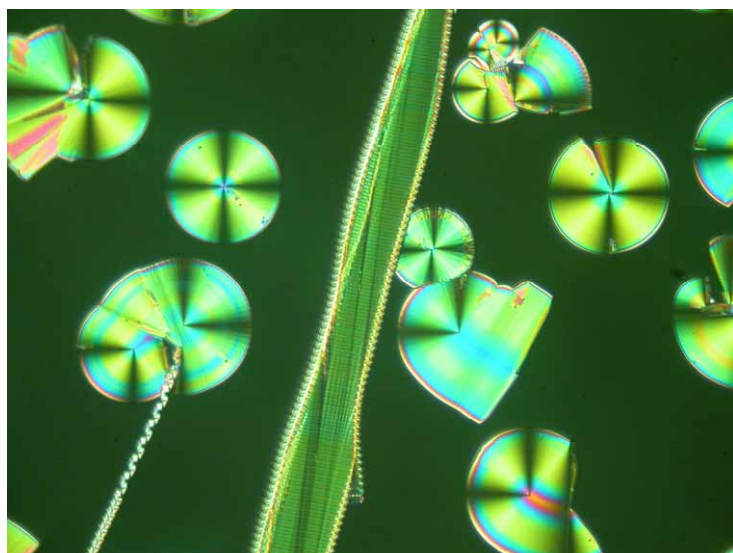

Fig. S2

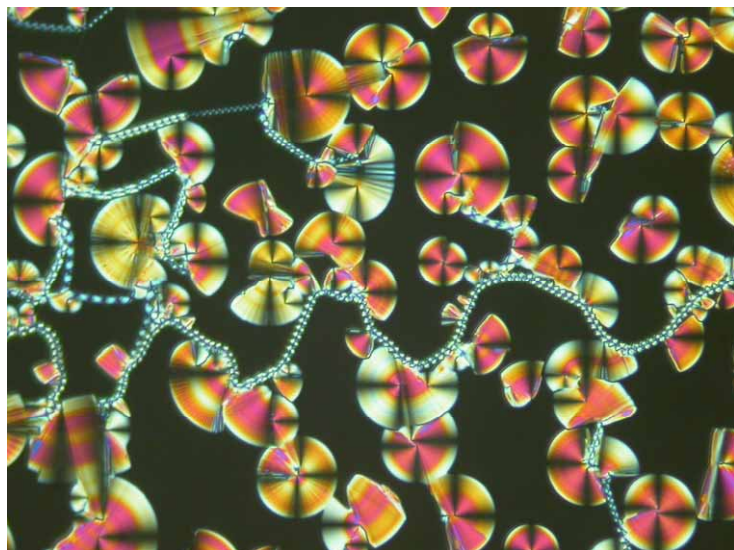

Fig. S3

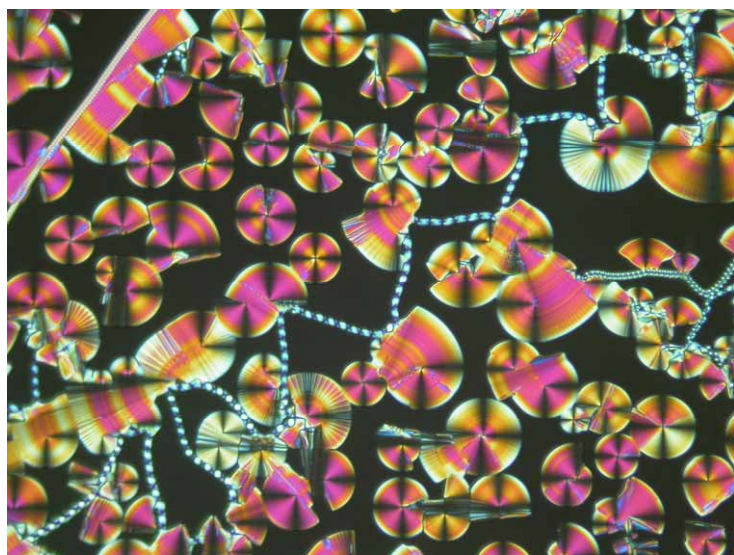

Fig. S4

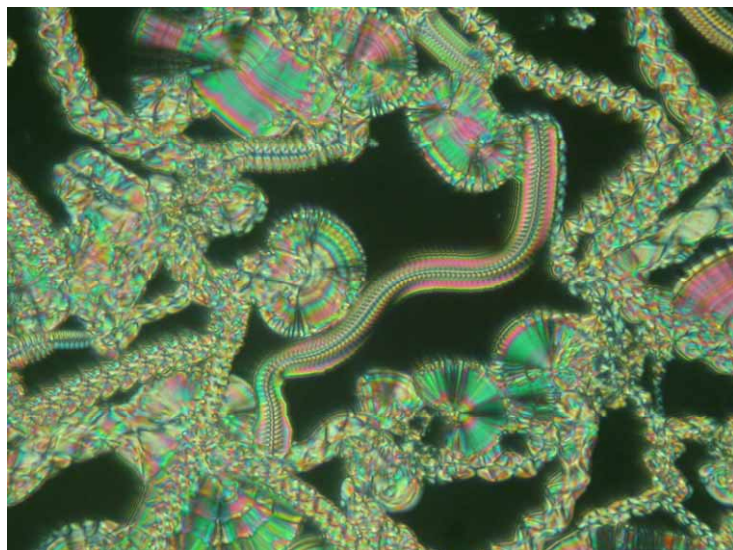

Fig. S5

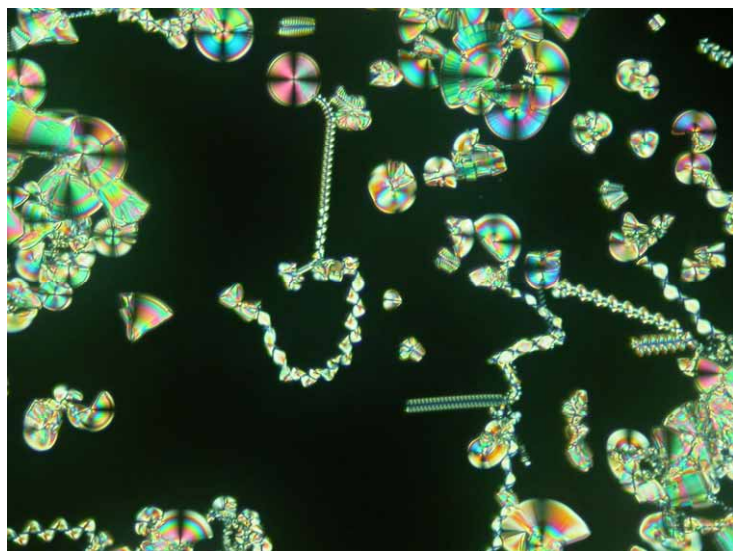

Fig. S6

References in ESI:

- S1 R. Achten, A. Koudijs, M. Giesbers, A. T. M. Marcelis, E. J. R. Sudhölter, M. W. Schröder, W. Weissflog, *Liq. Cryst.* 2007, **34**, 59
- S2 B. Kosata, G.-M. Tamba, U. Baumeister, K. Pelz, S. Diele, G. Pelzl, G. Galli, S. Samaritani, E.V. Agina, N. I. Boiko, V. P. Shibaev, W. Weissflog, *Chem. Mat.* 2006, **18**, 691
- S3 R. Achten, A. Koudijs, M. Giesbers, R. Amaranatha Reddy, T. Verhulst, C. Tschierske, A. T. M. Marcelis, E. J. R. Sudhölter, *Liq. Cryst.* 2006, **33**, 681; Ch. Keith, G. Dantlgraber, R. Amaranatha Reddy, U. Baumeister, M. Prehm, H. Hahn, H. Lang, C. Tschierske, *J. Mater. Chem.* 2007, **17**, 3796
- S4 V. Novotna, V. Hamplova, M. Kaspar, M. Glogarova, D. Pociеча, *Liq. Cryst.* 2005, **32**, 1115
- S5 V. Novotna, M. Kaspar, V. Hamplova, M. Glogarova, L. Lejcek, J. Kroupa, D. Pociеча, *J. Mater. Chem.* 2006, **16**, 2031
- S6 V. Kozmik, A. Kovarova, M. Kuchar, J. Svoboda, V. Novotna, M. Glogarova, J. Kroupa, *Liq. Cryst.* 2006, **33**, 41
- S7 Ch. Keith, G. Dantlgraber, R. Amaranatha Reddy, U. Baumeister, C. Tschierske, *Chem. Mater.* 2007, **19**, 694
- S8 Xiaofang Chen, K. K. Tenneti, C. Y. Li, Yaowen Bai, Xinhua Wan, Xinghe Fan, Qi-Feng Zhou, Lixia Rong, B.S. Hsiao, *Macromolecules* 2007, **40**, 840
- S9 Ch. Keith, R. Amaranatha Reddy, U. Baumeister, H. Hahn, H. Lang, C. Tschierske, *J. Mater. Chem.* 2006, **16**, 3444
- S10 Ch. Keith, R. Amaranatha Reddy, M. Prehm, U. Baumeister, H. Kresse, J. Lorenzo Chao, H. Hahn, H. Lang, C. Tschierske, *Chem. Europ. J.* 2007, **13**, 2556
- S11 R. Amaranatha Reddy, U. Baumeister, C. Keith, H. Hahn, H. Lang, C. Tschierske, *Soft Matter*, 2007, **3**, 558
- S12 R. Amaranatha Reddy, U. Baumeister, C. Keith, C. Tschierske, *J. Mater. Chem.* 2007, **17**, 62
- S13 D. Wiant, J. T. Gleeson, N. Eber, K. Fodor-Csorba, A. Jakli, T. Toth-Katona, *Phys. Rev. E* 2005, **72**, 041712
- S14 G. Galli, S. Demel, C. Slugovc, F. Stelzer, W. Weissflog, S. Diele, K. Fodor-Csorba, *Mol. Cryst. Liq. Cryst.* 2005, **439**, 43
- S15 J. Barbera, I. de Francisco, P. Forcen, N. Gimeno, L. Monreal, M.B. Ros and J.L. Serrano, 9th International Ferroelectric Liquid Crystal Conference, **2003**, Dublin, book of abstracts, p. 87
- S16 J. Barbera, N. Gimeno, L. Monreal, R. Pinol, M. B. Ros, J. L. Serrano, *J. Am. Chem. Soc.* 2004, **126**, 7190
- S17 C.-D. Keum, A. Kanazawa, T. Ikeda, *Adv. Mater.* 2001, **13**, 321
- S18 A. C. Sentman, D. L. Gin, *Angew. Chem.* 2003, **115**, 1859
- S19 W. Weissflog, S. Sokolowski, H. Dehne, Banani Das, S. Grande, M. W. Schröder, A. Eremin, S. Diele, G. Pelzl, H. Kresse, *Liq. Cryst.* 2004, **31**, 923
- S20 R. Amaranatha Reddy, B. K. Sadashiva, *J. Mater. Chem.* 2004, **14**, 1936
- S21 D. Shen, A. Pegenau, S. Diele, I. Wirth and C. Tschierske, *J. Am. Chem. Soc.* 2000, **122**, 1593
